# Supplementary material for: Graphene-like nanocomposites anchored by Ni3S2 slices for Li-ion storage
Source: Royal Society of Chemistry journal article supplement (doi:10.1039/c6ra03503e), 2016-01-01
Supplement: c6ra03503e1.pdf [file c6ra03503e1.pdf]

## Electronic Supplementary Information

### Graphene-like nanocomposites anchored by Ni<sub>3</sub>S<sub>2</sub> Slices for Li-ion storage

Peng Yu<sup>a</sup>, Jianqiang Wang<sup>b</sup>, Dongdong Zhao<sup>a</sup>, Chungui Tian,<sup>a</sup> Li Zhao<sup>a</sup>, Haitao Yu<sup>a\*</sup>, Lei Wang<sup>a\*</sup>

<sup>a</sup> Key Laboratory of Functional Inorganic Material Chemistry. Ministry of Education of the People' s Republic of China. Heilongjiang University, Harbin 150080 (P. R. China). Fax: (+86) 451-8666-1259. E-mail: fuhg@vip.sina.com

<sup>b</sup> Shanghai Synchrotron Radiation Facility (SSRF), Shanghai Institute of Applied Physics, Chinese Academy of Sciences. Shanghai, 201204, P. R. China

**Table S1.** The names and the corresponding experimental parameters of the synthetic samples.

| samples                                 | The initial dosage of                                | The initial dosage of | The initial dosage of |
|-----------------------------------------|------------------------------------------------------|-----------------------|-----------------------|
|                                         | Ni(NO <sub>3</sub> ) <sub>3</sub> ·9H <sub>2</sub> O | GO                    | glucose               |
| Ni <sub>3</sub> S <sub>2</sub>          | 0.001 mol                                            | -                     | -                     |
| Ni <sub>3</sub> S <sub>2</sub> -RGO     | 0.001 mol                                            | 0.02 g                | -                     |
| Ni <sub>3</sub> S <sub>2</sub> @C-RGO   | 0.002 mol                                            | 0.02 g                | 0.001mol              |
| Ni <sub>3</sub> S <sub>2</sub> @C-RGO-1 | 0.001 mol                                            | 0.02 g                | 0.001mol              |
| Ni <sub>3</sub> S <sub>2</sub> @C-RGO-2 | 0.003mol                                             | 0.02 g                | 0.001mol              |

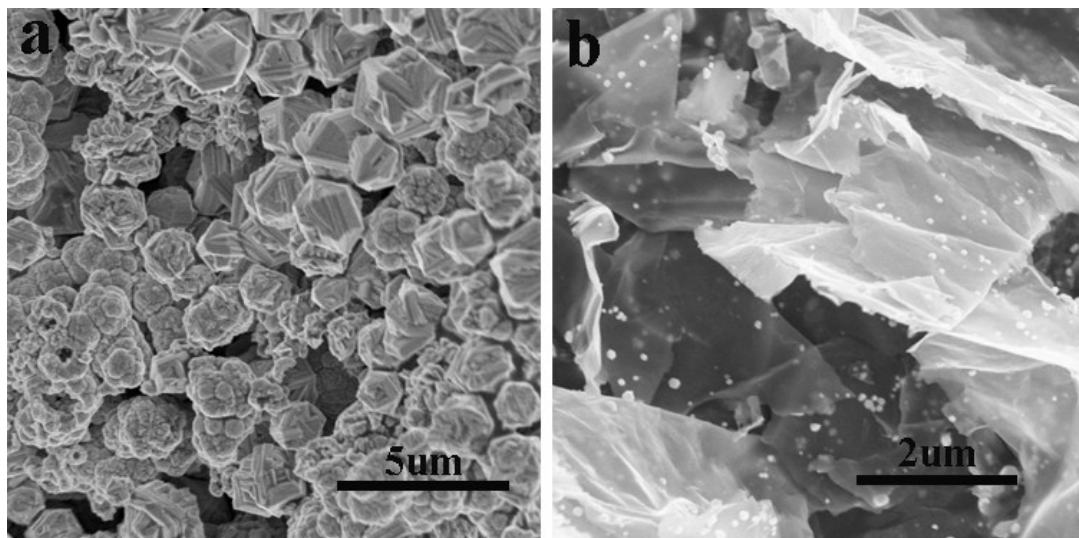

**Fig. S1.** SEM images of (a) Ni<sub>3</sub>S<sub>2</sub> and (b) Ni<sub>3</sub>S<sub>2</sub>-RGO samples, respectively.

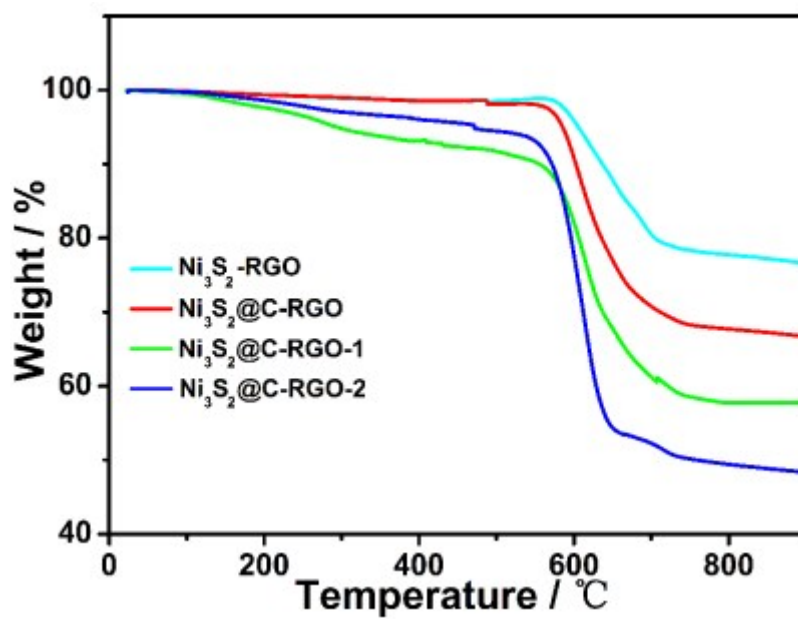

**Fig. S2** TG curves for pure Ni<sub>3</sub>S<sub>2</sub>-RGO, Ni<sub>3</sub>S<sub>2</sub>@C-RGO, Ni<sub>3</sub>S<sub>2</sub>@C-RGO-1 and Ni<sub>3</sub>S<sub>2</sub>@C-RGO-2 composite.

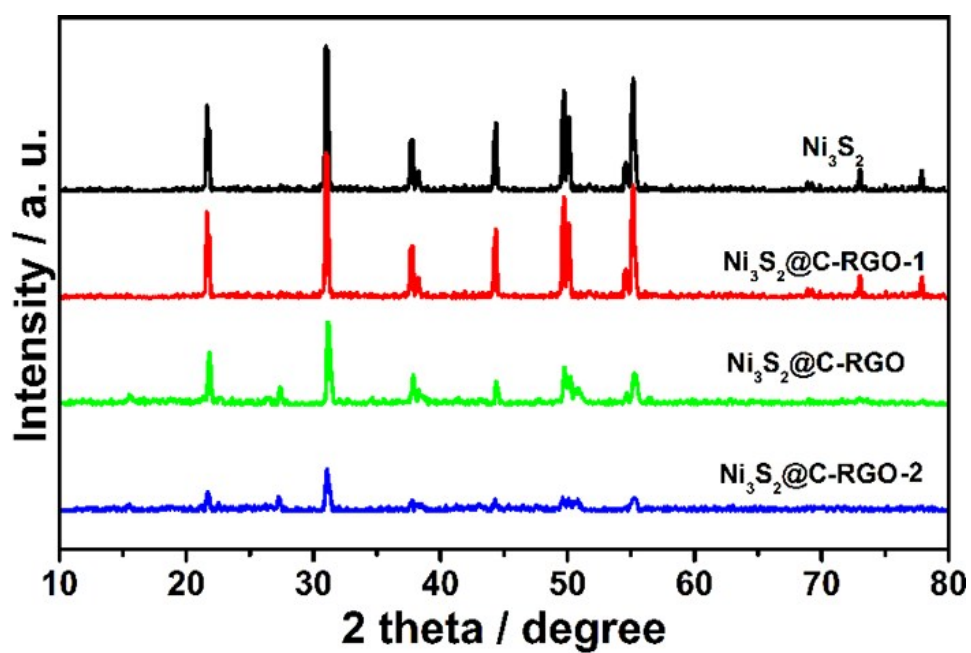

**Fig.S3** XRD patterns for  $\text{Ni}_3\text{S}_2$ ,  $\text{Ni}_3\text{S}_2@\text{C-RGO}$ ,  $\text{Ni}_3\text{S}_2@\text{C-RGO-1}$  and  $\text{Ni}_3\text{S}_2@\text{C-RGO-2}$  composite.

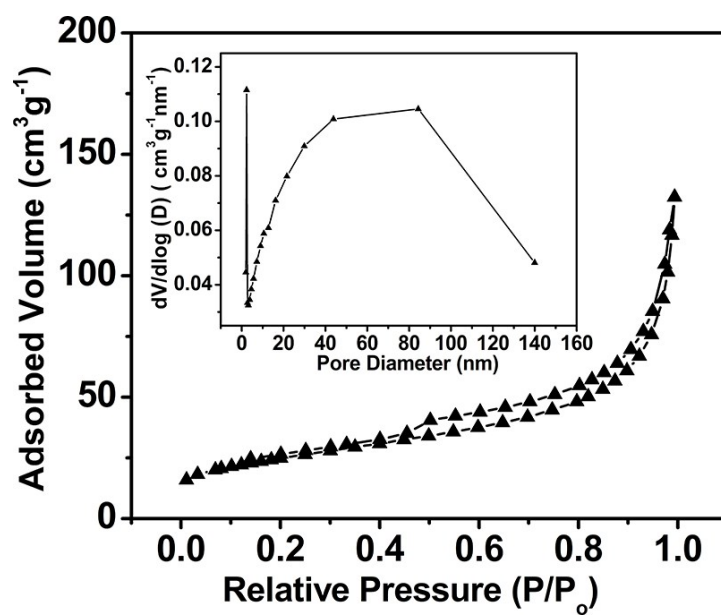

**Fig. S4** N<sub>2</sub> adsorption/desorption isotherms at 77 K and the corresponding NLDFIT PSD curves of the Ni<sub>3</sub>S<sub>2</sub>@C-RGO.

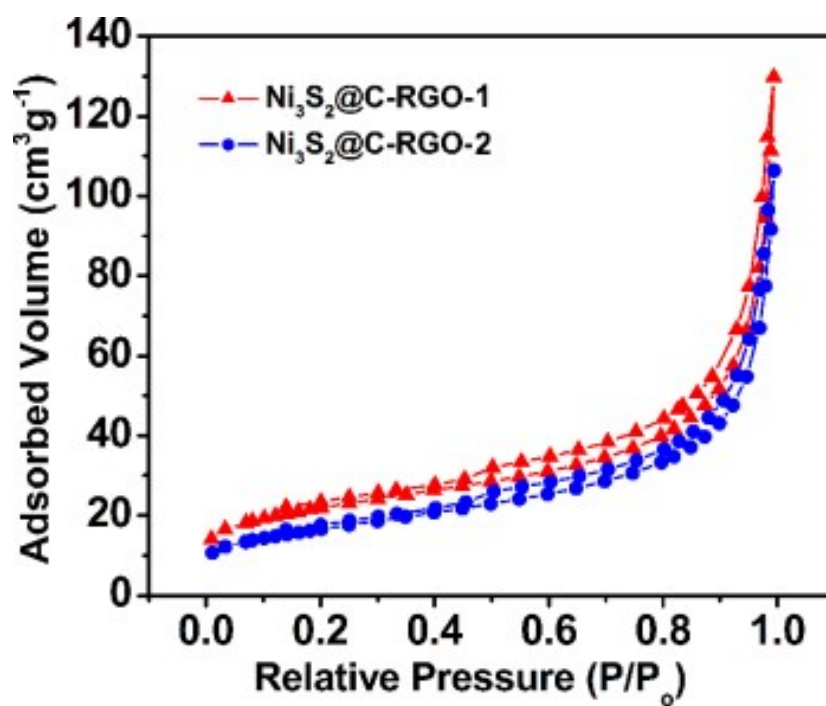

**Fig. S5** N<sub>2</sub> adsorption/desorption isotherms at 77 K and the corresponding NLDFIT PSD curves of the Ni<sub>3</sub>S<sub>2</sub>@C-RGO-1 and Ni<sub>3</sub>S<sub>2</sub>@C-RGO-2.

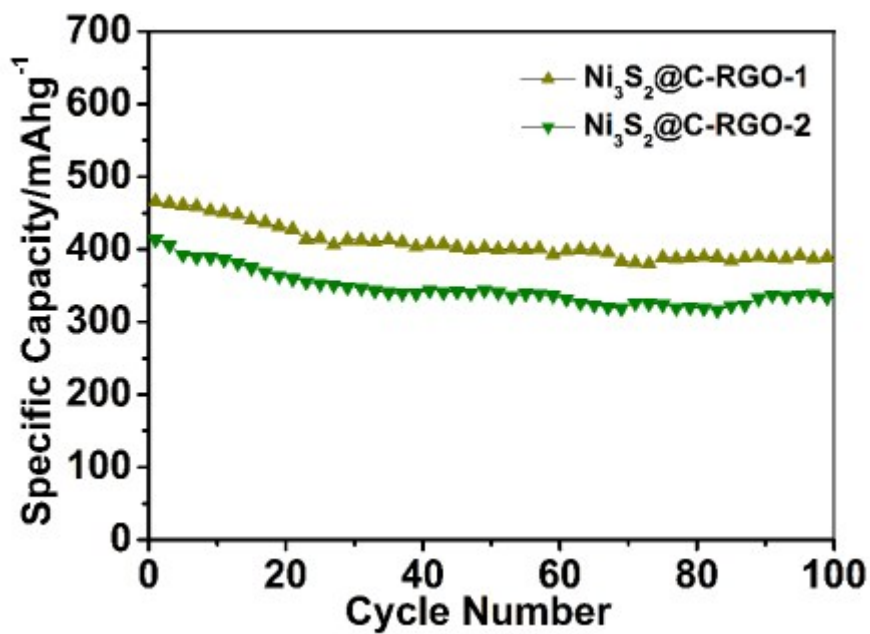

**Fig. S6** Cyclic performance of the Ni<sub>3</sub>S<sub>2</sub>@C-RGO-1, and Ni<sub>3</sub>S<sub>2</sub>@C-RGO-2 electrodes for 100 cycles at rate of 100 mA g<sup>-1</sup>.

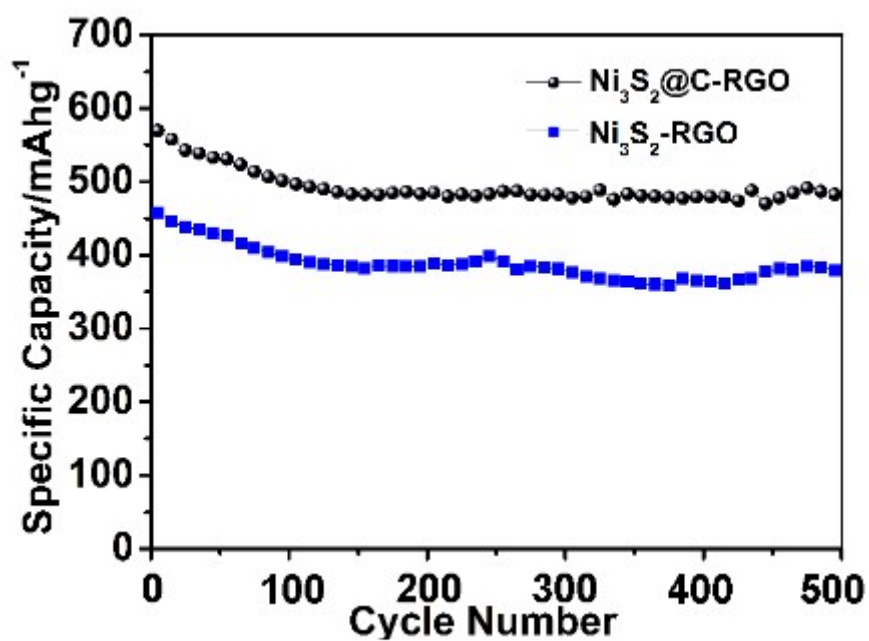

**Fig. S7** Cyclic performance of the Ni<sub>3</sub>S<sub>2</sub>-RGO, and Ni<sub>3</sub>S<sub>2</sub>@C-RGO electrodes for 100 cycles at rate of 100 mA g<sup>-1</sup>.



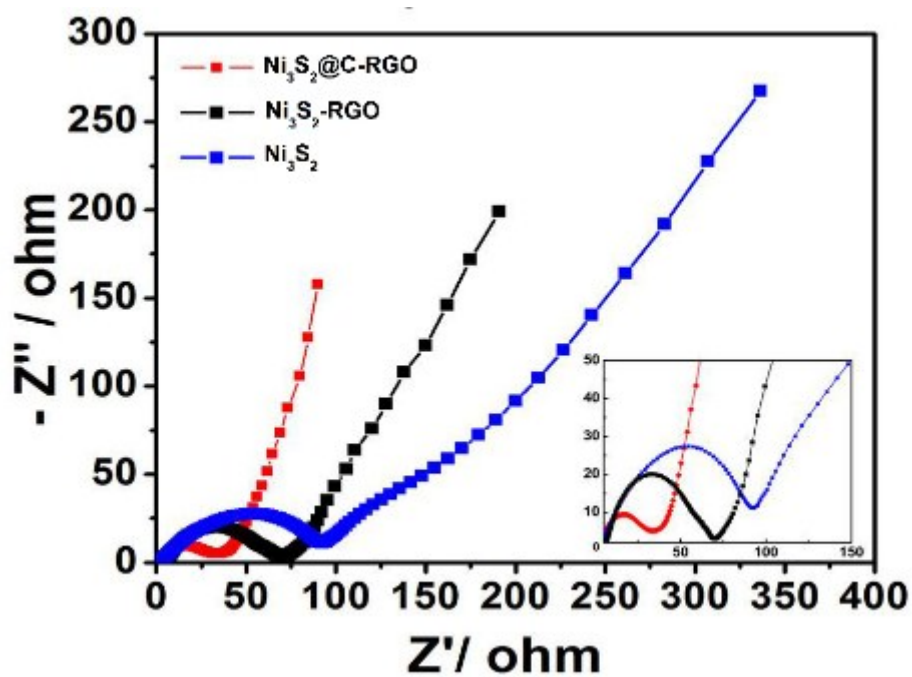

**Fig. S8** Nyquist plots for  $\text{Ni}_3\text{S}_2$ ,  $\text{Ni}_3\text{S}_2$ -RGO and  $\text{Ni}_3\text{S}_2$ @C-RGO electrodes in the frequency range from 100 kHz to 100 mHz.

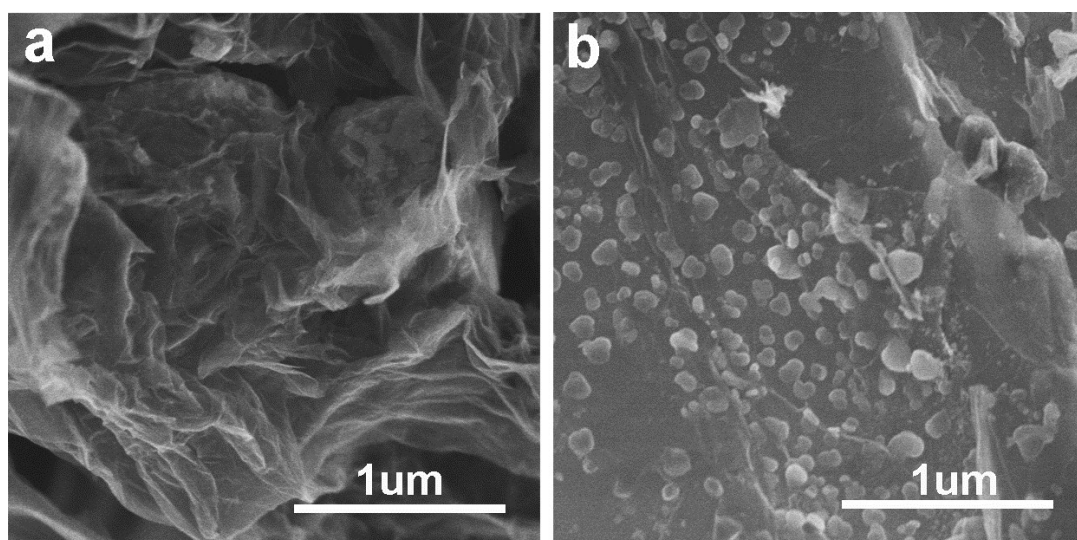

**Fig. S9** SEM images of the  $\text{Ni}_3\text{S}_2$ -RGO, and  $\text{Ni}_3\text{S}_2$ @C-RGO electrodes after 500 cycles at a rate of  $100 \text{ mA g}^{-1}$ .
